# Supplementary material
Source: Springer Nature journal article supplement (https://www.springermedizin.de/resource/supplementary/12936_2014_3278_MOESM9_ESM.pdf/9545484)
Supplement: MOESM9 [file 9545484]

*Execution*

| Outcome assessment | Selection patients | Selection CHWs | Missing data | Other bias | <i>n</i> observations |
|--------------------|--------------------|----------------|--------------|------------|-----------------------|
|--------------------|--------------------|----------------|--------------|------------|-----------------------|

Counihan 2012

|   |   |   |   |   |
|---|---|---|---|---|
| + | - | + | + | + |
|---|---|---|---|---|

63, 61 and 59 CHWs conducting 1 RDT

Mukanga 2011

|   |   |   |   |   |
|---|---|---|---|---|
| + | + | + | + | + |
|---|---|---|---|---|

182 RDTs

Harvey 2008

|   |   |   |   |   |
|---|---|---|---|---|
| + | ? | - | + | + |
|---|---|---|---|---|

32, 21 and 26 RDTs (1 per CHW)

Hawkes 2009

|   |   |   |   |   |
|---|---|---|---|---|
| + | ? | + | + | + |
|---|---|---|---|---|

10 CHWs, number of RDT observations unclear

Ndiaye 2013

|   |   |   |   |   |
|---|---|---|---|---|
| + | + | ? | + | + |
|---|---|---|---|---|

30 CHWs, number of RDTs unclear
